# Supplementary material for: A diverse suite of pharmaceuticals contaminates stream and riparian food webs
Source: PubMed Central journal article supplement (PMC6219508; doi:10.1038/s41467-018-06822-w), 2018-11-06
Supplement: 41467_2018_6822_MOESM1_ESM.pdf [file 41467_2018_6822_MOESM1_ESM.pdf]

1 Richmond et al.

2 A diverse suite of pharmaceuticals contaminates stream and riparian food webs

3 **Supplementary information:**

4 **Authors:**

5 Erinn K. Richmond<sup>1\*</sup>, Emma Rosi<sup>2</sup>, David. M. Walters<sup>3</sup>, Jerker Fick<sup>4</sup>, Stephen K.

6 Hamilton<sup>2,5</sup>, Tomas Brodin<sup>4</sup>, Anna Sundelin<sup>4</sup> and Michael R. Grace<sup>1</sup>

7 **Affiliations:**

8 <sup>1</sup>Water Studies Centre, School of Chemistry, Monash University, Clayton Victoria, Australia

9 <sup>2</sup>Cary Institute of Ecosystem Studies, Millbrook, New York 12545, USA

10 <sup>3</sup>U.S. Geological Survey, Fort Collins, Colorado 80526, USA

11 <sup>4</sup>Umeå University, Sweden

12 <sup>5</sup>Kellogg Biological Station and Dept. Integrative Biology, Michigan State University,

13 Hickory Corners, Michigan 49060, USA

14 \* Corresponding author: [erinn.richmond@monash.edu](mailto:erinn.richmond@monash.edu)

15

16

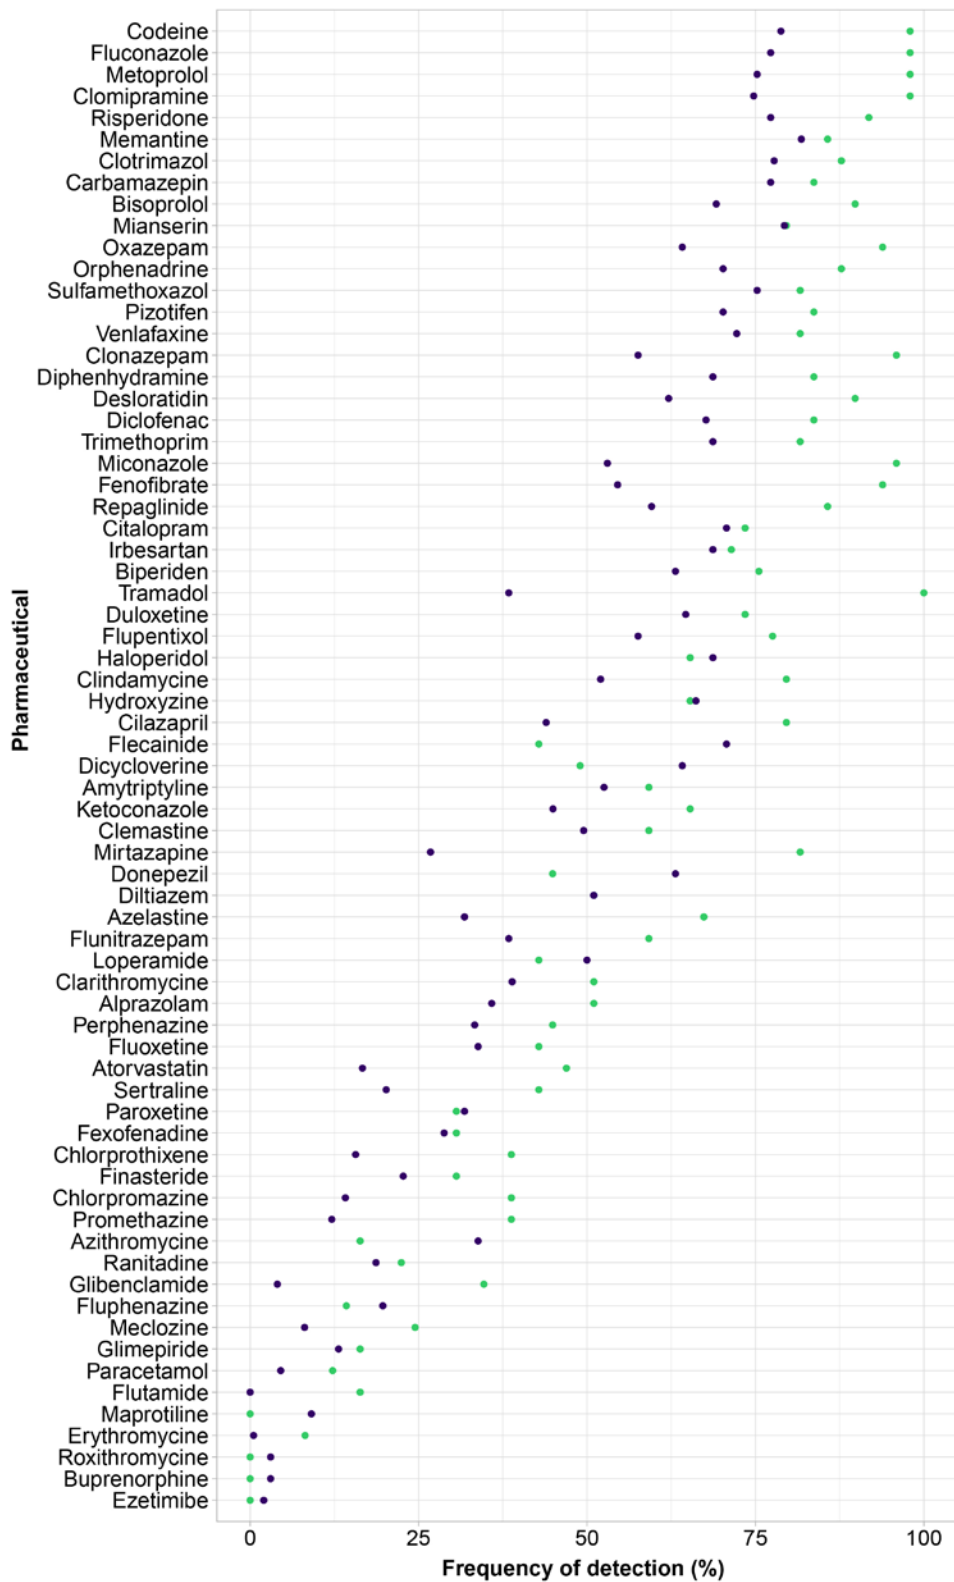

17

18 **Supplementary Figure 1.** Frequency of detections for larval insects with emergent adult  
 19 stages (purple circles) and riparian spiders (green circles) across all six study sites arranged  
 20 from most to least frequently detected.

21

22

23

| Site                | Suburb/ locality               | Latitude/ Longitude coordinates |
|---------------------|--------------------------------|---------------------------------|
| Brushy Creek        | Churnside Park                 | -37.759363, 145.292702          |
| Mullum-Mullum Creek | Donvale                        | -37.794465, 145.203102          |
| Scotchmans Creek    | Mount Waverley                 | -37.886777, 145.134560          |
| Ferny Creek         | Upwey                          | -37.915742, 145.325717          |
| Sassafras Creek     | Monbulk                        | -37.877138, 145.403029          |
| Lyrebird Creek      | Dandenong Ranges National Park | -37.850140, 145.384924          |

24

25 **Supplementary Table 1.** Location of study streams in eastern Melbourne, Victoria,  
26 Australia. Sites are ordered based on sewage influence (as indicated by biofilm  $\delta^{15}\text{N}$ ) from  
27 highest to lowest

28

29

30 **Supplementary Table 2.** Physicochemical properties at all sites based on two sampling dates in 2014-2015. (EC = electrical conductivity  
 31 mS/cm, Turb = turbidity in NTU (Nephelometric Turbidity Units), DO= dissolved oxygen, Temp = temperature, FRP = filterable reactive  
 32 phosphorus, DOC = dissolved organic carbon, TOC = total organic carbon). SD = standard deviation. Water samples were collected and  
 33 analysed in triplicate.

34

| 2014          |      | Flow   | pH   | EC      | Turb  | DO    | Temp  | NH <sub>3</sub> | FRP   | NO <sub>2</sub> <sup>-</sup> | NO <sub>3</sub> <sup>-</sup> | DOC  | TOC   | Total P | Total N |
|---------------|------|--------|------|---------|-------|-------|-------|-----------------|-------|------------------------------|------------------------------|------|-------|---------|---------|
|               |      | (ML/d) |      | (mS/cm) | (NTU) | mg/L  | (°C)  | mg/L            | mg/L  | mg/L                         | mg/L                         | mg/L | mg/L  | mg/L    | mg/L    |
| Brushy        | Mean | 10.13  | 6.69 | 0.57    | 14.40 | 4.85  | 15.52 | 0.50            | 0.17  | 0.09                         | 3.51                         | 6.55 | 6.53  | 0.28    | 5.40    |
|               | SD.  | -      | 0.01 | 0.00    | 0.55  | 0.05  | 0.04  | 0.01            | 0.00  | 0.00                         | 0.10                         | 0.03 | 0.04  | 0.01    | 0.36    |
| Mullum-Mullum | Mean | 1.50   | 7.23 | 0.31    | 19.20 | 10.12 | 10.10 | 0.03            | 0.03  | 0.01                         | 0.88                         | 4.12 | 4.22  | 0.08    | 1.40    |
|               | SD.  | -      | 0.01 | 0.00    | 0.45  | 0.01  | 0.00  | 0.002           | 0.00  | 0.00                         | 0.02                         | 0.09 | 0.11  | 0.01    | 0.00    |
| Scotchmans    | Mean | 22.91  | 6.59 | 0.24    | 22.00 | 8.27  | 12.60 | 0.03            | 0.02  | 0.01                         | 0.61                         | 5.51 | 6.38  | 0.08    | 1.53    |
|               | SD.  | -      | 0.01 | 0.00    | 0.00  | 0.12  | 0.00  | 0.01            | 0.00  | 0.00                         | 0.18                         | 0.04 | 0.18  | 0.02    | 0.15    |
| Ferny         | Mean | 1.94   | 5.77 | 0.13    | 13.40 | 10.51 | 9.81  | 0.02            | 0.02  | 0.01                         | 1.09                         | 8.69 | 11.21 | 0.07    | 1.67    |
|               | SD.  | -      | 0.02 | 0.00    | 0.55  | 0.02  | 0.01  | 0.00            | 0.00  | 0.00                         | 0.10                         | 0.33 | 0.06  | 0.01    | 0.49    |
| Sassafrass    | Mean | 6.19   | 5.77 | 0.13    | 13.40 | 10.51 | 9.81  | 0.01            | 0.05  | 0.00                         | 1.81                         | 1.63 | 1.92  | 0.07    | 2.30    |
|               | SD.  | -      | 0.02 | 0.00    | 0.55  | 0.02  | 0.01  | 0.002           | 0.004 | 0.00                         | 0.34                         | 0.06 | 0.23  | 0.01    | 0.26    |
| Lyrebird      | Mean | 2.82   | 7.02 | 0.88    | 39.60 | 9.29  | 11.60 | 0.03            | 0.003 | 0.01                         | 0.40                         | 4.64 | 6.12  | 0.04    | 0.80    |
|               | SD.  | -      | 0.01 | 0.00    | 1.14  | 0.09  | 0.00  | 0.003           | 0     | 0.00                         | 0.02                         | 0.07 | 0.07  | 0.01    | 0.27    |

| <b>2015</b>   |      | <b>Flow</b>   | <b>pH</b> | <b>EC</b>      | <b>Turb</b>  | <b>DO</b>   | <b>Temp</b> | <b>NH<sub>3</sub></b> | <b>FRP</b>  | <b>NO<sub>2</sub>-</b> | <b>NO<sub>3</sub>-</b> | <b>DOC</b>  | <b>TOC</b>  | <b>Total P</b> | <b>Total N</b> |
|---------------|------|---------------|-----------|----------------|--------------|-------------|-------------|-----------------------|-------------|------------------------|------------------------|-------------|-------------|----------------|----------------|
|               |      | <b>(ML/d)</b> |           | <b>(mS/cm)</b> | <b>(NTU)</b> | <b>mg/L</b> | <b>(°C)</b> | <b>mg/L</b>           | <b>mg/L</b> | <b>mg/L</b>            | <b>mg/L</b>            | <b>mg/L</b> | <b>mg/L</b> | <b>mg/L</b>    | <b>mg/L</b>    |
| Brushy        | Mean | 5.24          | 6.17      | 0.63           | 2.82         | 4.92        | 21.14       | 1.87                  | 0.01        | 0.15                   | 5.62                   | 282         | 378.00      | 0.05           | 7.70           |
|               | SD.  | -             | 0.00      | 0.00           | 1.58         | 0.06        | 0.00        | 0.06                  | 0.00        | 0.01                   | 0.32                   | 286.4       | 101.39      | 0.00           | 1.48           |
| Mullum-Mullum | Mean | 0.87          | 8.37      | 0.30           | 6.20         | 10.72       | 22.61       | 0.05                  | 0.03        | 0.01                   | 0.26                   | 42.3        | 44.67       | 0.07           | 0.67           |
|               | SD.  | -             | 0.00      | 0.00           | 0.20         | 0.02        | 0.00        | 0.00                  | 0.00        | 0.00                   | 0.01                   | 10.6        | 5.77        | 0.00           | 0.01           |
| Scotchmans    | Mean | 0.43          | 7.06      | 0.45           | 0.00         | 3.99        | 17.68       | 0.10                  | 0.02        | 0.01                   | 0.10                   | 24.33       | 43.33       | 0.09           | 0.50           |
|               | SD   | -             | 0.00      | 0.00           | 0.00         | 0.01        | 0.00        | 0.00                  | 0.00        | 0.00                   | 0.00                   | 6.35        | 22.37       | 0.00           | 0.05           |
| Ferny         | Mean | 1.40          | 7.24      | 0.45           | 0.00         | 4.27        | 18.95       | 0.05                  | 0.03        | 0.01                   | 0.56                   | 119.8       | 52.33       | 0.08           | 1.10           |
|               | SD.  | -             | 0.00      | 0.00           | 0.00         | 0.01        | 0.00        | 0.00                  | 0.00        | 0.00                   | 0.06                   | 33.26       | 40.53       | 0.00           | 0.00           |
| Sassafras     | Mean | 3.62          | 6.69      | 0.13           | 4.91         | 5.57        | 16.80       | 0.09                  | 0.37        | 0.01                   | 0.52                   | 20.5        | 16.67       | 0.26           | 2.43           |
|               | SD.  | -             | 0.00      | 0.00           | 3.16         | 1.84        | 0.00        | 0.02                  | 0.07        | 0.00                   | 0.02                   | 14.5        | 7.09        | 0.02           | 0.06           |
| Lyrebird      | Mean | 0.28          | 7.04      | 0.09           | 31.96        | 7.55        | 14.09       | 0.02                  | 0.00        | 0.00                   | 0.21                   | 7.07        | 11.83       | 0.03           | 0.51           |
|               | SD.  | -             | 0.01      | 0.00           | 0.23         | 0.02        | 0.00        | 0.00                  | 0.00        | 0.00                   | 0.00                   | 0.46        | 3.88        | 0.00           | 0.03           |

35

36

37 **Supplementary Table 3.** List of target pharmaceuticals tested, including ATC (anatomical  
38 therapeutic chemical) code, pharmaceutical name, therapeutic class, ATC level, maximum  
39 recommended defined daily dose for humans (Max DDD), and limit of quantification (LOQ).  
40 Footnotes denote additional therapeutic uses. Note that Max DDD per class was averaged to  
41 estimate what percentage dose a platypus or brown trout may be exposed to in this study.

42

| ATC Code | Pharmaceutical  | Class                                         | ATC Level | Max. DDD (mg/day) | LOQ (ng g <sup>-1</sup> ) |
|----------|-----------------|-----------------------------------------------|-----------|-------------------|---------------------------|
| G04CA01  | Alfuzosin       | Urologicals                                   | 2         | 7.5               | 0.1                       |
| N05BA12  | Alprazolam      | Psycholeptics                                 | 2         | 1                 | 10.0                      |
| C01BD01  | Amiodarone      | Antiarrhythmics                               | 3         | 200               | 50.0                      |
| N06AA09  | Amitriptyline   | Antidepressants                               | 2         | 75                | 5.0                       |
| C07AB03  | Atenolol        | Beta blocking agents                          | 3         | 75                | 5.0                       |
| C10AA05  | Atorvastatin    | Lipid modifying agents                        | 3         | 20                | 10.0                      |
| M03AC04  | Atracurium      | Muscle relaxants                              | 3         | ND                | 0.5                       |
| R01AC03  | Azelastine      | Antihistamines <sup>1</sup>                   | 3         | 4                 | 5.0                       |
| J01FA10  | Azithromycin    | Antibiotics <sup>2</sup>                      | 4         | 500               | 5.0                       |
| R01AD01  | Beclometasone   | Corticosteroids <sup>3</sup>                  | 4         | 1.5               | 10.0                      |
| N04AA02  | Biperiden       | Anti-Parkinson                                | 2         | 10                | 0.1                       |
| C07AB07  | Bisoprolol      | Beta blocking agents                          | 3         | 10                | 0.1                       |
| N04BC01  | Bromocriptine   | Anti-Parkinson <sup>4</sup>                   | 2         | 40                | 5.0                       |
| A07EA06  | Budesonide      | Corticosteroids <sup>3</sup>                  | 4         | 9                 | 10.0                      |
| N07BC01  | Buprenorphine   | Opioids                                       | 3         | 8                 | 10.0                      |
| N06AX12  | Bupropion       | Antidepressants                               | 3         | 300               | 0.1                       |
| N03AF01  | Carbamazepine   | Antiepileptics                                | 3         | 1000              | 1.0                       |
| N05AA01  | Chlorpromazine  | Psycholeptics                                 | 2         | 300               | 5.0                       |
| N05AF03  | Chlorprothixene | Psycholeptics                                 | 2         | 300               | 10.0                      |
| C09AA08  | Cilazapril      | Agents acting on the renin-angiotensin system | 2         | 2.5               | 1.0                       |
| J01MA02  | Ciprofloxacin   | Antibiotics <sup>5</sup>                      | 4         | 1000              | 10.0                      |
| N06AB04  | Citalopram      | Antidepressants                               | 3         | 20                | 5.0                       |
| J01FA09  | Clarithromycin  | Antibiotics                                   | 4         | 1000              | 1.0                       |
| R06AA04  | Clemastine      | Antihistamines                                | 2         | 2                 | 0.5                       |
| J01FF01  | Clindamycin     | Antibiotics <sup>6</sup>                      | 4         | 180               | 1.0                       |
| N06AA04  | Clomipramine    | Antidepressants                               | 3         | 100               | 0.5                       |
| N03AE01  | Clonazepam      | Antiepileptic                                 | 3         | 8                 | 5.0                       |
| D01AC01  | Clotrimazol     | Antifungal                                    | 3         | 100               | 1.0                       |
| R05DA04  | Codeine         | Analgesics <sup>7</sup>                       | 3         | 100               | 0.5                       |
| R06AX02  | Cyproheptadine  | Antihistamines                                | 2         | 12                | 5.0                       |
| R06AX27  | Desloratadine   | Antihistamines                                | 2         | 5                 | 0.5                       |
| M01AB05  | Diclofenac      | NSAID                                         | 3         | 100               | 10.0                      |

|         |                   |                                                 |   |      |      |
|---------|-------------------|-------------------------------------------------|---|------|------|
| A03AA07 | Dicycloverine     | Drugs for functional gastrointestinal disorders | 3 | 80   | 5.0  |
| N02CA01 | Dihydroergotamine | Analgesics                                      | 2 | 4    | 15.0 |
| C08DB01 | Diltiazem         | Calcium channel blockers                        | 2 | 240  | 0.5  |
| R06AA02 | Diphenhydramine   | Antihistamines                                  | 2 | 300  | 0.1  |
| B01AC07 | Dipyridamole      | Antithrombotic agent                            | 3 | 400  | 1.0  |
| N06DA02 | Donepezil         | Psychoanaleptics                                | 2 | 7.5  | 0.5  |
| N06AX21 | Duloxetine        | Antidepressants                                 | 3 | 60   | 1.0  |
| C09CA02 | Eprosartan        | Agents acting on the renin-angiotensin system   | 2 | 600  | 5.0  |
| J01FA01 | Erythromycin      | Antibiotics <sup>2</sup>                        | 4 | 200  | 20.0 |
| C10AX09 | Ezetimibe         | Lipid modifying agents                          | 3 | 10   | 50.0 |
| C10AB05 | Fenofibrate       | Lipid modifying agents                          | 3 | 200  | 10.0 |
| N01AH01 | Fentanyl          | Analgesics <sup>8, 15</sup>                     | 2 | 1.2  | 0.5  |
| R06AX26 | Fexofenadine      | Antihistamines                                  | 2 | 120  | 5.0  |
| G04CB01 | Finasteride       | Urological <sup>9</sup>                         | 2 | 5    | 10.0 |
| C01BC04 | Flecainide        | Antiarrhythmics                                 | 3 | 200  | 0.1  |
| J02AC01 | Fluconazole       | Antifungal                                      | 2 | 200  | 0.5  |
| N05CD03 | Flunitrazepam     | Psycholeptics                                   | 2 | 1    | 10.0 |
| N06AB03 | Fluoxetine        | Antidepressants                                 | 3 | 20   | 5.0  |
| N05AF01 | Flupentixol       | Psycholeptics                                   | 3 | 6    | 5.0  |
| N05AB02 | Fluphenazine      | Psycholeptics                                   | 3 | 10   | 10.0 |
| L02BB01 | Flutamide         | Anti-Androgens                                  | 4 | 750  | 5.0  |
| A10BB01 | Glibenclamide     | Blood glucose lowering drugs                    | 3 | 10   | 10.0 |
| A10BB12 | Glimepiride       | Blood glucose lowering drugs                    | 3 | 2    | 10.0 |
| N05AD01 | Haloperidol       | Psycholeptics                                   | 3 | 8    | 0.1  |
| N05BB01 | Hydroxyzine       | Psycholeptics                                   | 3 | 75   | 0.5  |
| C09CA04 | Irbesartan        | Agents acting on the renin-angiotensin system   | 2 | 150  | 0.5  |
| J02AB02 | Ketoconazole      | Antifungal <sup>10</sup>                        | 3 | 200  | 10.0 |
| N05AA02 | Levomepromazine   | Psycholeptics                                   | 2 | 300  | 50.0 |
| A07DA03 | Loperamide        | Anti propulsives                                | 4 | 10   | 0.5  |
| N06AA21 | Maprotiline       | Antidepressants                                 | 3 | 100  | 5.0  |
| R06AE05 | Meclizine         | Antihistamines                                  | 3 | 50   | 5.0  |
| N06DX01 | Memantine         | Psychoanaleptics                                | 2 | 20   | 0.5  |
| C07AB02 | Metoprolol        | Beta blocking agents                            | 3 | 150  | 5.0  |
| N06AX03 | Mianserin         | Antidepressants                                 | 3 | 60   | 1.0  |
| D01AC02 | Miconazole        | Antifungal <sup>11</sup>                        | 3 | 1000 | 5.0  |
| N06AX11 | Mirtazapine       | Antidepressants                                 | 3 | 30   | 10.0 |
| V03AB15 | Naloxone          | Antidotes                                       | 4 | ND   | 1.0  |
| N06AX06 | Nefazodone        | Antidepressants                                 | 3 | 400  | 0.5  |
| J01MA06 | Norfloxacin       | Antibiotics <sup>5</sup>                        | 4 | 800  | 10.0 |
| J01MA01 | Ofloxacin         | Antibiotics <sup>5</sup>                        | 4 | 400  | 10.0 |
| N04AB02 | Orphenadrine      | Muscle relaxants                                | 3 | 200  | 0.1  |
| N05BA04 | Oxazepam          | Psycholeptics                                   | 2 | 50   | 5.0  |

|         |                  |                                                              |   |      |      |
|---------|------------------|--------------------------------------------------------------|---|------|------|
| J01AA06 | Oxytetracycline  | Antibiotics <sup>13</sup>                                    | 4 | 1000 | 10.0 |
| N02BE01 | Paracetamol      | Analgesics                                                   | 2 | 3000 | 10.0 |
| N06AB05 | Paroxetine       | Antidepressants                                              | 3 | 20   | 10.0 |
| N05AB03 | Perphenazine     | Psycholeptics                                                | 2 | 30   | 10.0 |
| N02CX01 | Pizotifen        | Analgesics                                                   | 2 | 1.5  | 0.5  |
| R06AD02 | Promethazine     | Antihistamines                                               | 2 | 25   | 10.0 |
| A02BA02 | Ranitidine       | Drugs for peptic ulcer and gastro-oesophageal reflux disease | 3 | 300  | 5.0  |
| A10BX02 | Repaglinide      | Blood glucose lowering drugs                                 | 3 | 4    | 0.5  |
| N05AX08 | Risperidone      | Psycholeptics                                                | 2 | 5    | 0.1  |
| C10AA07 | Rosuvastatin     | Lipid modifying agents                                       | 3 | 10   | 10.0 |
| J01FA06 | Roxithromycin    | Antibiotics <sup>2</sup>                                     | 4 | 300  | 15.0 |
| N06AB06 | Sertraline       | Antidepressants                                              | 3 | 50   | 10.0 |
| C07AA07 | Sotalol          | Beta blocking agents                                         | 3 | 160  | 0.5  |
| J01EC01 | Sulfamethoxazole | Antibiotics <sup>16</sup>                                    | 4 | 2000 | 5.0  |
| J01EE01 | Tamoxifen        | Endocrine therapy                                            | 2 | 20   | 5.0  |
| L02BA01 | Telmisartan      | Agents acting on the renin-angiotensin system                | 2 | 40   | 1.0  |
| C09CA07 | Terbutaline      | Adrenergics                                                  | 3 | 20   | 0.5  |
| R03CC03 | Tetracycline     | Antibiotics <sup>13</sup>                                    | 4 | 1000 | 50.0 |
| J01AA07 | Tramadol         | Analgesics                                                   | 2 | 300  | 5.0  |
| N02AX02 | Trihexyphenidyl  | Anti-Parkinson                                               | 2 | 10   | 0.1  |
| N04AA01 | Trimethoprim     | Antibiotics <sup>14</sup>                                    | 4 | 400  | 0.1  |
| N06AX16 | Venlafaxine      | Antidepressants                                              | 3 | 100  | 0.5  |
| C08DA01 | Verapamil        | Calcium channel blockers                                     | 2 | 240  | 10.0 |
| N05CF02 | Zolpidem         | Psycholeptics                                                | 2 | 10   | 0.5  |

43

44 **Table notes:**

45 <sup>1</sup> Decongestants and anti-allergenic

46 <sup>2</sup> Macrolides

47 <sup>3</sup> Glucocorticoids

48 <sup>4</sup> Prolactin inhibitors

49 <sup>5</sup> Fluoroquinolones

50 <sup>6</sup> Lincosamide

51 <sup>7</sup> Cough suppressants

52 <sup>8</sup> Aesthetic

53 <sup>9</sup> Dermatological applications

54 <sup>10</sup> Gynaecological anti-infective

55 <sup>11</sup> Stomatological and topical

56 <sup>12</sup> Anti-Parkinson's

57 <sup>13</sup> Tetracycline

58 <sup>14</sup> Trimethoprim derivatives

59 <sup>15</sup> Opioid

60 <sup>16</sup> Sulphonamides

61



62 **Supplementary Table 4.** Summary comparison of pharmaceutical concentrations (ng g<sup>-1</sup>) in  
 63 filter-feeding Hydropsychid caddisfly larvae and grazing snails (*Physa* sp.) at Brushy Creek.  
 64 Total concentrations for the entire population and averages per individual are shown. *Note:*  
 65 *Snail concentration is for tissue only; shells were removed.*

|                     | <b>Total pharm.<br/>Concentration (ng g<sup>-1</sup>)</b> | <b>Average pharm.<br/>Concentration (ng g<sup>-1</sup>)</b> | <b>± SE</b> | <b>Number of<br/>compounds</b> |
|---------------------|-----------------------------------------------------------|-------------------------------------------------------------|-------------|--------------------------------|
| <b>Hydropsychid</b> | 264,299                                                   | 699                                                         | 113         | 63                             |
| <i>Physa</i>        | 190,818                                                   | 505                                                         | 67          | 63                             |

66  
 67  
 68  
 69

**Supplementary Table 5.** List of benthic invertebrate taxa at each site

| <b>Site</b>          | <b>Order</b>  | <b>Family</b>                         |
|----------------------|---------------|---------------------------------------|
| <b>Brushy</b>        | Trichoptera   | Hydropsychidae, <i>Cheumatopsyche</i> |
|                      | Trichoptera   | Hydropsychidae, <i>Diplectrona</i>    |
|                      | Trichoptera   | Ecnomidae                             |
|                      | Trichoptera   | Hydroptilidae                         |
|                      | Trichoptera   | Hydrobiosidae                         |
|                      | Trichoptera   | Conoesucidae                          |
|                      | Trichoptera   | Leptoceridae                          |
|                      | Trichoptera   | Helicophidae                          |
|                      | Trichoptera   | Philorheithridae                      |
|                      | Trichoptera   | Calocidae                             |
|                      | Diptera       | Chironomidae, non-Tanypodinae         |
|                      | Diptera       | Chironomidae, <i>Tanypodinae</i>      |
|                      | Diptera       | Simuliidae                            |
|                      | Coleoptera    | Psephenidae                           |
|                      | Physidae      | Physidae                              |
| <b>Mullum-Mullum</b> | Trichoptera   | Hydropsychidae, <i>Cheumatopsyche</i> |
|                      | Trichoptera   | Ecnomidae                             |
|                      | Trichoptera   | Hydrobiosidae                         |
|                      | Diptera       | Chironomidae, non-Tanypodinae         |
|                      | Diptera       | Chironomidae, <i>Tanypodinae</i>      |
|                      | Diptera       | Simuliidae                            |
|                      | Diptera       | Tipulidae                             |
|                      | Diptera       | Psychodidae                           |
|                      | Ephemeroptera | Baetidae                              |
|                      | Coleoptera    | Psephenidae                           |
|                      | Hemiptera     | Corixidae                             |
|                      | Hemiptera     | Velidae                               |

|                   |                    |                                       |
|-------------------|--------------------|---------------------------------------|
|                   | Physidae           | Physidae                              |
|                   | Hygrophila         | Planorbidae                           |
|                   | Pholadida          | Sphaeriidae                           |
|                   | Oligochaeta        |                                       |
| <b>Scotchmans</b> | Trichoptera        | Hydropsychidae, <i>Cheumatopsyche</i> |
|                   | Trichoptera        | Ecnomidae                             |
|                   | Trichoptera        | Hydroptilidae                         |
|                   | Diptera            | Chironomidae, non- <i>Tanypodinae</i> |
|                   | Diptera            | Chironomidae <i>Tanypodinae</i>       |
|                   | Diptera            | Simuliidae                            |
|                   | Odonata, Zygoptera | Megapodagrionidae                     |
|                   | Neotaenioglossa    | Bithyniidae                           |
|                   | Physidae           | Physidae                              |
|                   | Hygrophila         | Planorbidae                           |
|                   | Hygrophila         | Lymnaeidae                            |
|                   | Veneroida          | Sphaeriidae                           |
|                   | Oligochaeta        |                                       |
|                   | Hirudinea          |                                       |
| <b>Ferny</b>      | Trichoptera        | Hydroptilidae                         |
|                   | Trichoptera        | Hydrobiosidae                         |
|                   | Trichoptera        | Leptoceridae                          |
|                   | Diptera            | Chironomidae, non- <i>Tanypodinae</i> |
|                   | Diptera            | Chironomidae, <i>Tanypodinae</i>      |
|                   | Diptera            | Simuliidae                            |
|                   | Diptera            | Tipulidae                             |
|                   | Diptera            | Ceratopogonidae                       |
|                   | Ephemeroptera      | Baetidae                              |
|                   | Plecoptera         | Gripopterygidae                       |
|                   | Coleoptera         | Elmidae larva                         |
|                   | Coleoptera         | Elmidae adult                         |
|                   | Hemiptera          | Velidae                               |
|                   | Neotaenioglossa    | Potamopyrgys                          |
|                   | Physidae           | Physidae                              |
|                   | Hygrophila         | Planorbidae                           |
|                   | Veneroida          | Sphaeriidae                           |
|                   | Oligochaeta        |                                       |
|                   | Hirudinea          |                                       |
|                   | Nematoda           |                                       |
| <b>Sassafras</b>  | Trichoptera        | Hydropsychidae <i>Cheumatopsyche</i>  |
|                   | Trichoptera        | Hydrobiosidae                         |
|                   | Trichoptera        | Conoesucidae                          |
|                   | Trichoptera        | Leptoceridae                          |
|                   | Trichoptera        | Helicophidae                          |
|                   | Trichoptera        | Philorheithridae                      |

|                 |               |                                       |
|-----------------|---------------|---------------------------------------|
|                 | Diptera       | Chironomidae, non- <i>Tanypodinae</i> |
|                 | Diptera       | Chironomidae <i>Tanypodinae</i>       |
|                 | Diptera       | Simuliidae                            |
|                 | Diptera       | Tipulidae                             |
|                 | Diptera       | Tabanidae                             |
|                 | Diptera       | Ceratopogonidae                       |
|                 | Diptera       | Athericidae                           |
|                 | Ephemeroptera | Baetidae                              |
|                 | Ephemeroptera | Leptophlebiidae                       |
|                 | Plecoptera    | Gripopterygidae                       |
|                 | Plecoptera    | Austroperlidae                        |
|                 | Plecoptera    | Notonemouridae                        |
|                 | Coleoptera    | Psephenidae                           |
|                 | Coleoptera    | Elmidae larva                         |
|                 | Coleoptera    | Elmidae adult                         |
|                 | Coleoptera    | Ptilodactylidae                       |
|                 | Coleoptera    | Scirtidae                             |
|                 | Hemiptera     | Velidae                               |
|                 | Mecoptera     | Nannochoristidae                      |
|                 | Hygrophila    | Planorbidae                           |
|                 | Hygrophila    | Lymnaeidae                            |
|                 | Amphipoda     | Eusiridae                             |
|                 | Oligochaeta   |                                       |
|                 | Isopoda       |                                       |
| <b>Lyrebird</b> | Trichoptera   | Hydropsychidae <i>Cheumatopsyche</i>  |
|                 | Trichoptera   | Hydropsychidae <i>Diplectrona</i>     |
|                 | Trichoptera   | Hydrobiosidae                         |
|                 | Trichoptera   | Philorheithridae                      |
|                 | Trichoptera   | Calocidae                             |
|                 | Diptera       | Chironomidae, non- <i>Tanypodinae</i> |
|                 | Diptera       | Chironomidae <i>Tanypodinae</i>       |
|                 | Diptera       | Simuliidae                            |
|                 | Diptera       | Tipulidae                             |
|                 | Diptera       | Tabanidae                             |
|                 | Diptera       | Ceratopogonidae                       |
|                 | Diptera       | Dolichopodidae                        |
|                 | Ephemeroptera | Leptophlebiidae                       |
|                 | Ephemeroptera | Oniscigastridae                       |
|                 | Plecoptera    | Gripopterygidae                       |
|                 | Plecoptera    | Austroperlidae                        |
|                 | Plecoptera    | Notonemouridae                        |
|                 | Coleoptera    | Psephenidae                           |
|                 | Coleoptera    | Elmidae larva                         |
|                 | Coleoptera    | Elmidae adult                         |

|  |                    |                  |
|--|--------------------|------------------|
|  | Coleptera          | Ptilodactylidae  |
|  | Odonata, Epiprocta | Corduliidae      |
|  | Odonata, Epiprocta | Aeshniidae       |
|  | Mecoptera          | Nannochoristidae |
|  | Megaloptera        | Sialidae         |
|  | Veneroida          | Sphaeriidae      |
|  | Amphipoda          | Eusiridae        |
|  | Amphipoda          | Talitridae       |
|  | Oligochaeta        |                  |
|  | Nematomorpha       | Gordioidea       |

70

71
